# Supplementary material for: A phosphorylation-based switch controls TAA1-mediated auxin biosynthesis in plants
Source: Nat Commun. 2020 Feb 3;11:679. doi: 10.1038/s41467-020-14395-w (PMC6997161; doi:10.1038/s41467-020-14395-w)
Supplement: Supplementary file 1 — Supplementary Information [file 41467_2020_14395_MOESM1_ESM.pdf]

Supplementary information for:

A phosphorylation-based switch controls TAA1-mediated auxin  
biosynthesis in plants

Q. Wang, G. Qin, M. Cao, R. Chen, Y. He, L. Yang, Z. Zeng, Y. Yu, Y. Gu, W. Xing, A. Tao, and T. Xu <sup>#</sup>

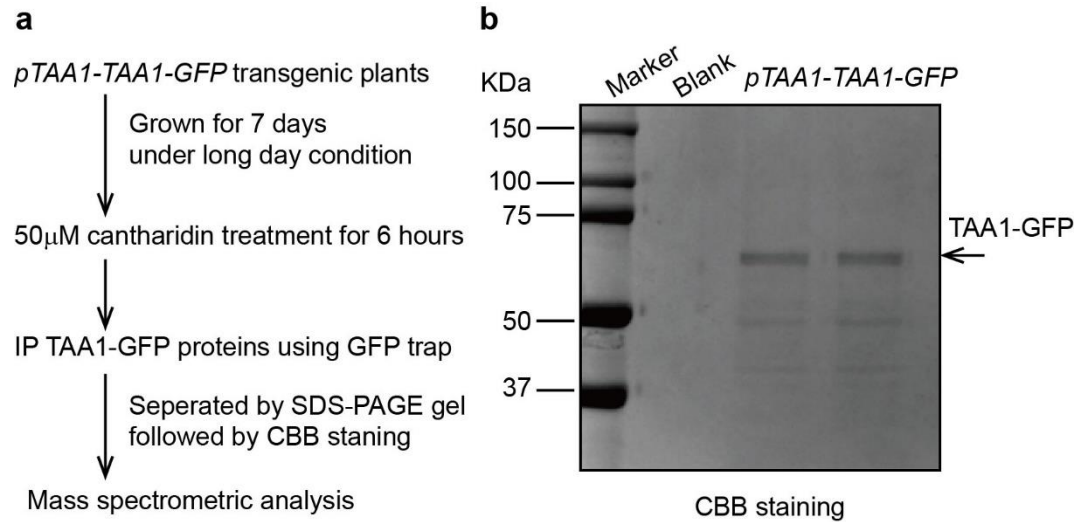

**Supplementary Figure 1. Immuno-precipitation of *in vivo* TAA1-GFP proteins for mass spectrometric analysis.**

**(a)** Procedure for collection of TAA1-GFP proteins.

**(b)** Image of SDS-PAGE gel stained by Coomassie brilliant blue (CBB). Immuno-precipitation result showed a clear band of TAA1-GFP proteins as the arrow indicated.

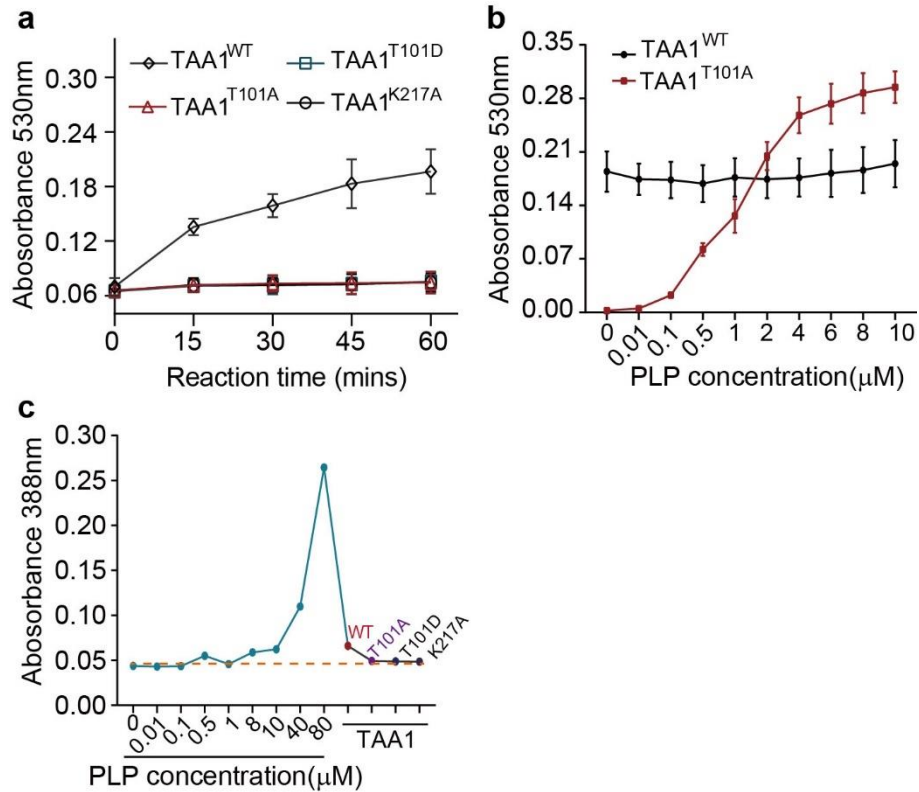

### Supplementary Figure 2. T101 mutation influences TAA1 binding with PLP.

(a) Transaminase activity detected by measuring IPA production with Salkowski reagent (see methods). Transaminase catalytic reactions were performed in the reaction reagent without PLP using about 2.5 μg recombinant TAA1-His proteins. The IPA products were measured by reading the absorbance at 530 nm at different time points. Only *E.coli*-purified TAA1<sup>WT</sup> exhibited normal enzymatic activity without exogenous PLP supply. Values denoted the mean ± s.d. (n=three biological independent repeats).

(b) Transaminase activity detected by measuring IPA production with Salkowski reagent. Transaminase catalytic reactions were performed in the reaction reagent with different concentrations of PLP. *E.coli*-purified TAA1<sup>T101A</sup> showed increased enzymatic activity when adding sufficient PLP. Values denoted the mean ± s.d. (n=three biological independent repeats).

(c) PLP detection through measuring the absorbance at 388 nm (see method). The *E.coli*-purified TAA1<sup>WT/ T101A/T101D/ K217A</sup> proteins were denatured at 95°C to release PLP from proteins. The supernatant containing PLP was obtained by centrifuging and used for PLP

detection by reading absorbance at 388 nm (see methods). The data showed that only *E.coli*-purified TAA1<sup>WT</sup> carried a certain amount of PLP from *E.coli*. Three repeats showed similar results.

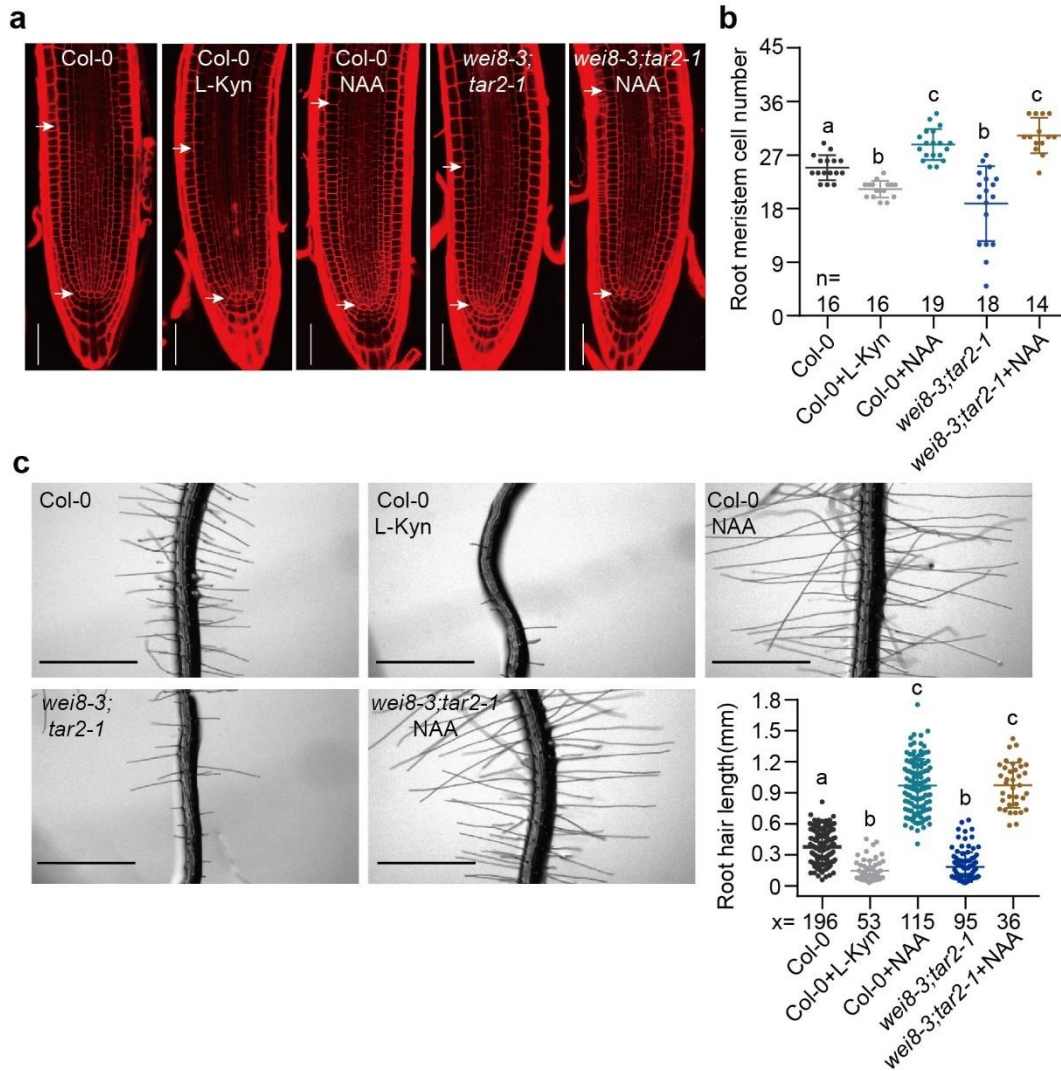

### Supplementary Figure 3. Auxin regulates root development.

(a) Representative pictures of root apical meristem from 5-day-old seedlings. White arrows show meristem zone, scale bar, 50  $\mu$ m. Around 3.19% (3/94: 3 among 94 seedlings showed strong phenotype) of *wei8-3;tar2-1* displayed collapsed root meristem.

(b) Quantification of root meristem size in (a). n denotes number of independent seedlings.

(c) Representative pictures of root hair from 5-day-old seedlings and quantification data. Col-0: n=20; Col-0+NAA: n=8; Col-0+L-Kyn: n=14; *wei8-3;tar2-1*: n=13; *wei8-3;tar2-1*+NAA: n=3. n denotes number of independent seedlings and x represents number of root hairs used for quantification. Scale bar, 1 mm. 20 nM NAA (sigma N0640) or 1.5  $\mu$ M L-Kyn (sigma K3750) was added into medium for treatment. One-way ANOVA with

Tukey multiple comparisons test was used in (b) and (c). Different letters represent significant difference between each other,  $P < 0.05$ (b),  $P < 0.0001$ (c).

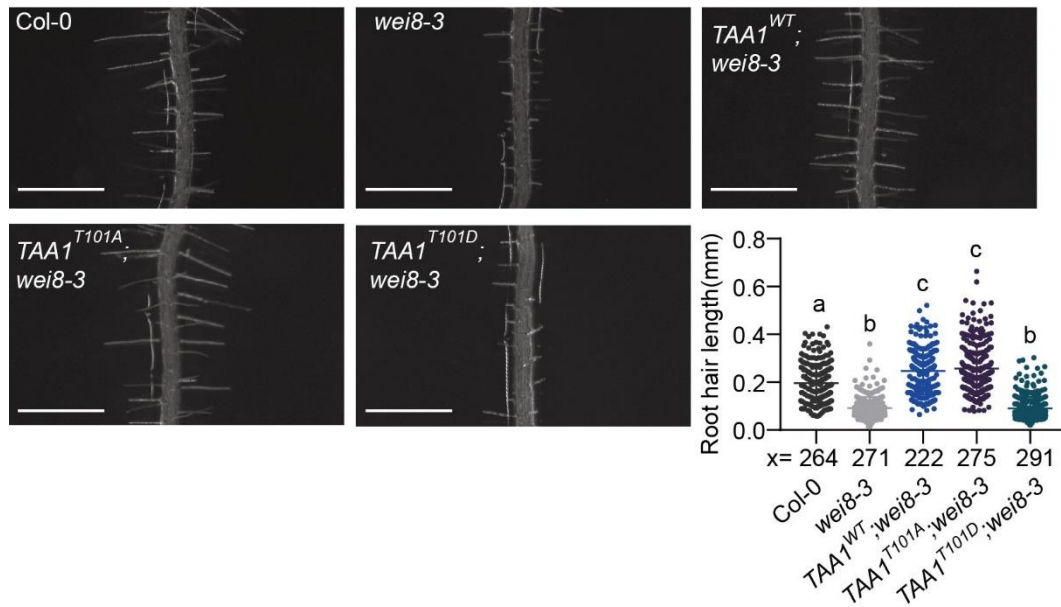

**Supplementary Figure 4. T101 of TAA1 is essential for root hair development.**

Representative pictures of root hair from 5-day-old seedlings and quantification data. Col-0: n=20; *wei8-3*: n=21; *TAA1*<sup>WT</sup>; *wei8-3*: n=19; *TAA1*<sup>T101D</sup>; *wei8-3*: n=20; *TAA1*<sup>T101A</sup>; *wei8-3*: n=35. n denotes number of independent seedlings and x represents number of root hairs used for quantification. Two independent lines of each transgenic plant showed similar results. Scale bar, 0.5 mm. One-way ANOVA with Tukey multiple comparisons test was used. Different letters represent significant difference between each other,  $P < 0.0001$ .

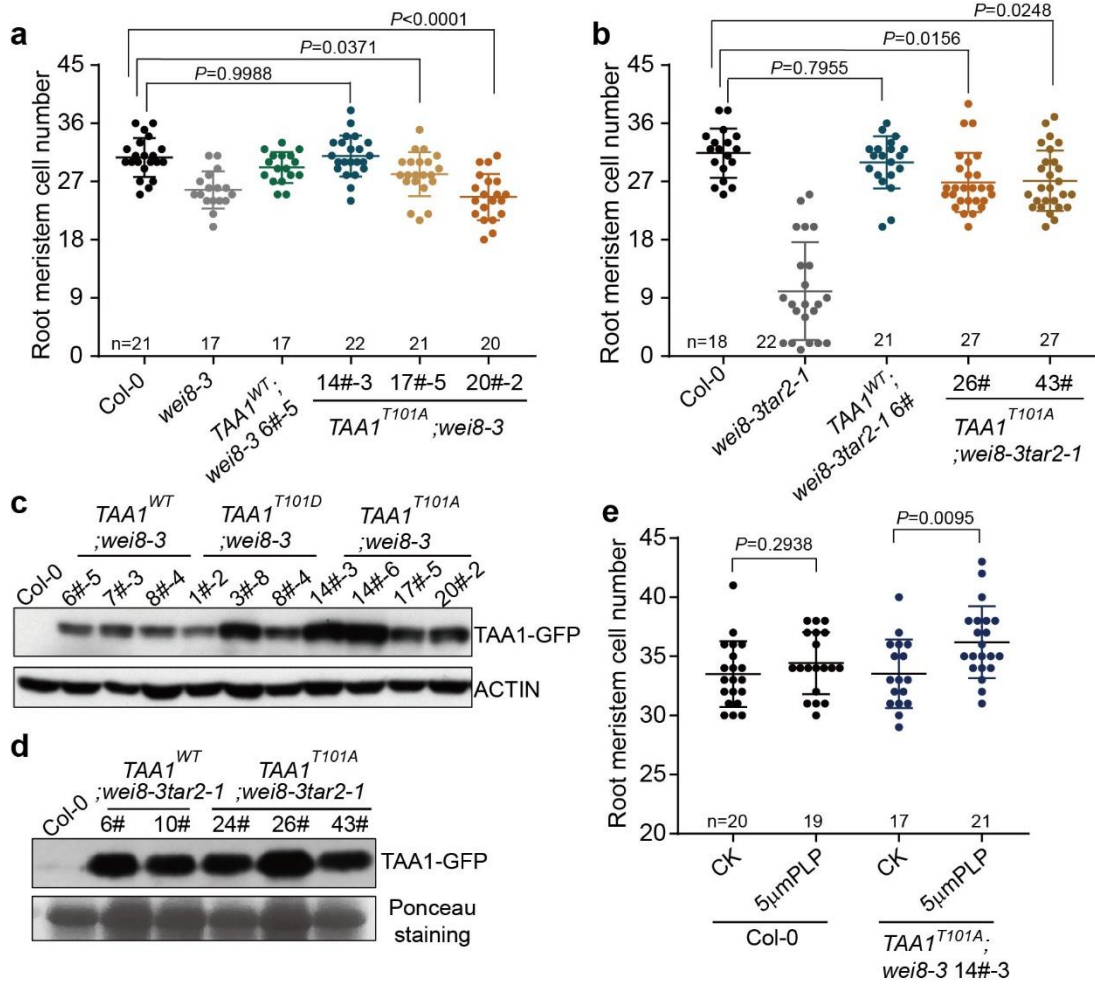

### Supplementary Figure 5. T101A is not fully functional *in vivo*.

(a) Quantification of root meristem size of *pTAA1-TAA1<sup>T101A</sup>;wei8-3* transgenic plants. *n* denotes number of independent seedlings. *P*-values were shown as indicated. One-way ANOVA with Dunnett multiple comparisons test was used comparing with Col-0.  $P<0.05$  indicates a significant difference.

(b) Quantification of root meristem size of *pTAA1-TAA1<sup>T101A</sup>;wei8-3;tar2-1* transgenic plants. *n* denotes number of independent seedlings. *P*-values were shown as indicated. One-way ANOVA with Dunnett multiple comparisons test was used comparing with Col-0.  $P<0.05$  indicates a significant difference.

(c, d) Western blot showed TAA1-GFP protein levels of different transgenic plants used in (a) and (b). 5-day-old seedlings were used for phenotypic analyses and proteins extraction. TAA1-GFP proteins were detected by anti-GFP antibodies (HT801, TransGen Biotech).

(e) Quantification of root meristem size of *pTAA1-TAA1<sup>T101A</sup>;wei8-3* treated with 5  $\mu$ M PLP. 5-day-old seedlings grown on 1/2 MS plates with or without 5  $\mu$ M PLP were used for phenotypic analysis. n denotes number of independent seedlings. *P*-values were shown as indicated. Two-sided *t*-test. Three independent repeats.

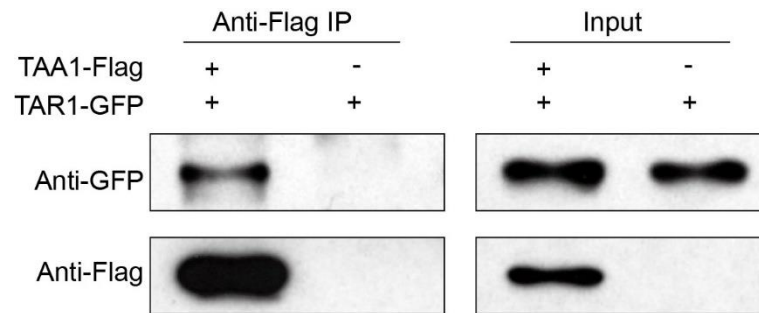

**Supplementary Figure 6. TAA1 and TAR1 form heterodimers *in vivo*.**

Co-IP assay showed interactions between TAA1 and TAR1 in Col-0 protoplast. 35S-TAA1-Flag and 35S-TAR1-GFP were transiently co-expressed in *Arabidopsis* protoplasts, single transformation of 35S-TAR1-GFP was used as a negative control. Three independent repeats with similar results.

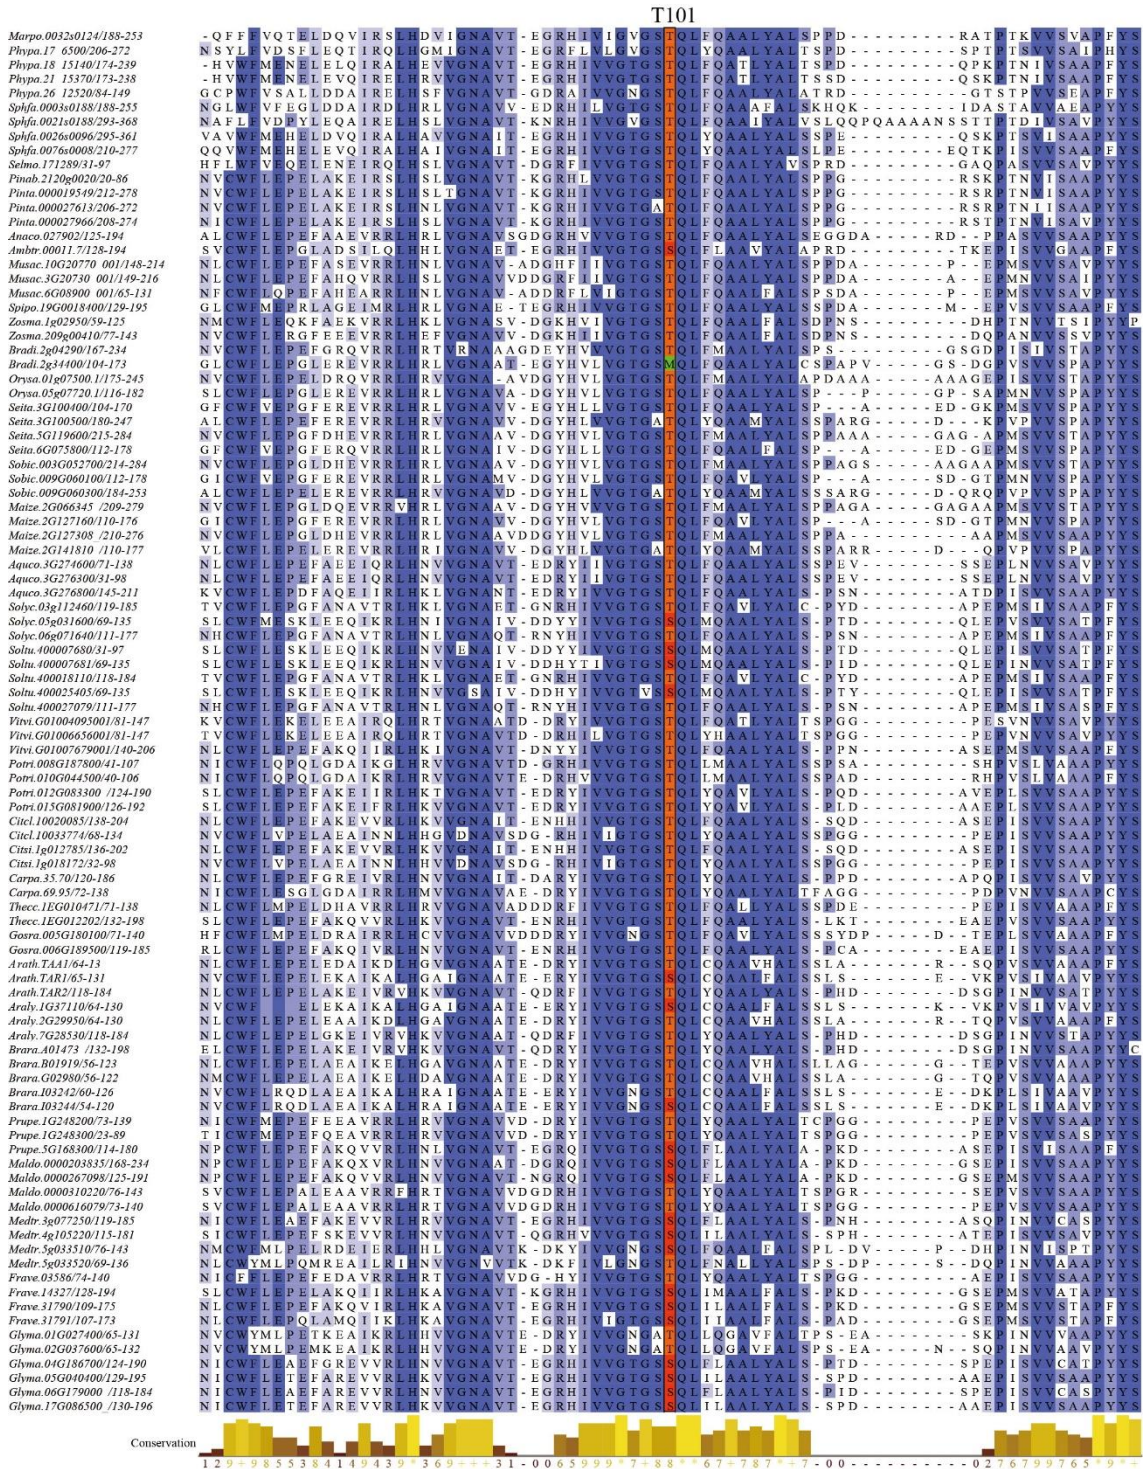

**Supplementary Figure 7. Sequence alignment of TAA1 orthologs among 32 species.**

For detailed information about proteins and species, see Supplementary Table 1. T101 residue of AtTAA1 was highlighted in orange.

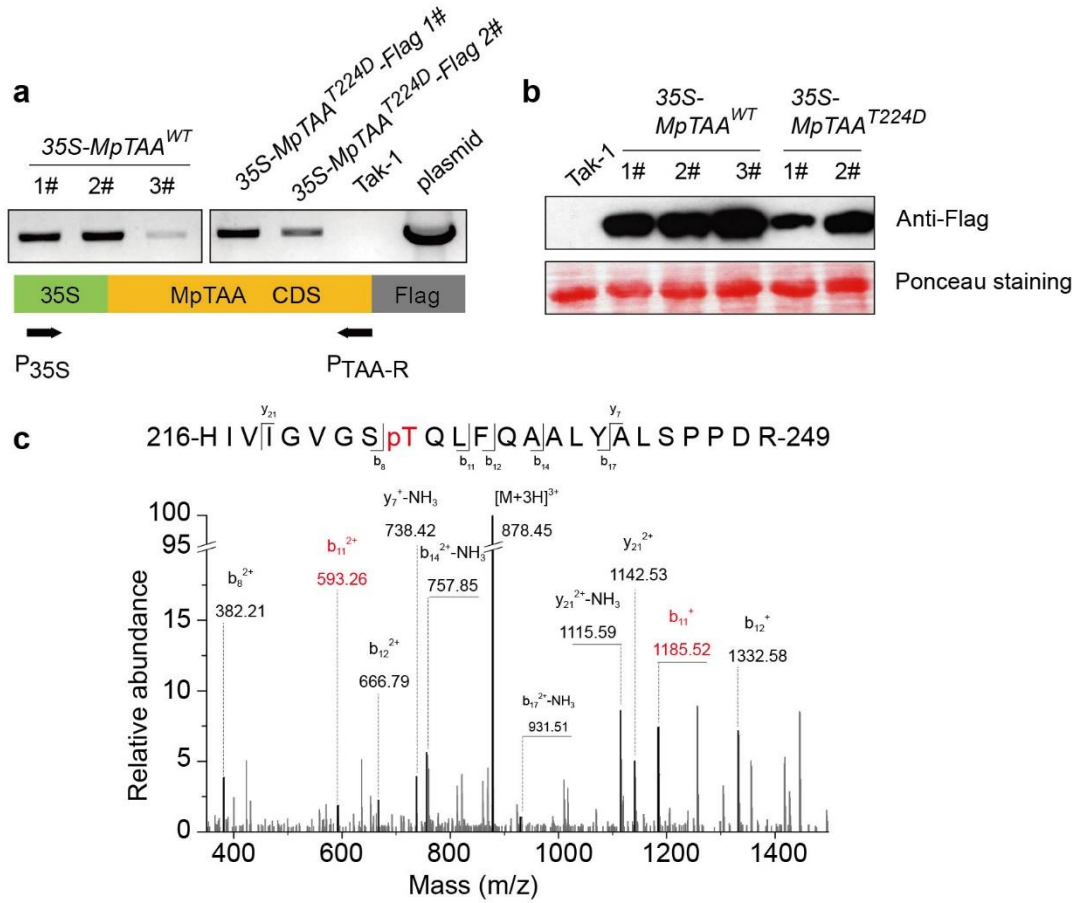

**Supplementary Figure 8. Phosphorylation modification of Thr224 on MpTAA protein *in vivo*.**

(a) PCR results showed successful transformation of constructs. 10-day-old thalli were used for genomic DNA extraction. Plasmid (35S-MpTAA-Flag) was used as a positive control. Arrows show the primers used for PCR. Primer sequences were list in Supplementary Table 2.

(b) Western blot results showed MpTAA-Flag protein levels of different transgenic plants. 20-day-old thalli were used for protein extraction. MpTAA-Flag proteins were detected by anti-Flag antibodies (M20008L, Abmart).

(c) Mass spectrometric analysis showed phosphorylation modification at Thr224 residue on MpTAA proteins. The mass increased 80 Da (weight of phosphate group) starting at b<sub>11</sub> ion that defined the phosphorylation modification at Thr224. 3-week-old 35S-MpTAA-Flag transgenic *Marchantia* was used to immuno-precipitate MpTAA proteins.

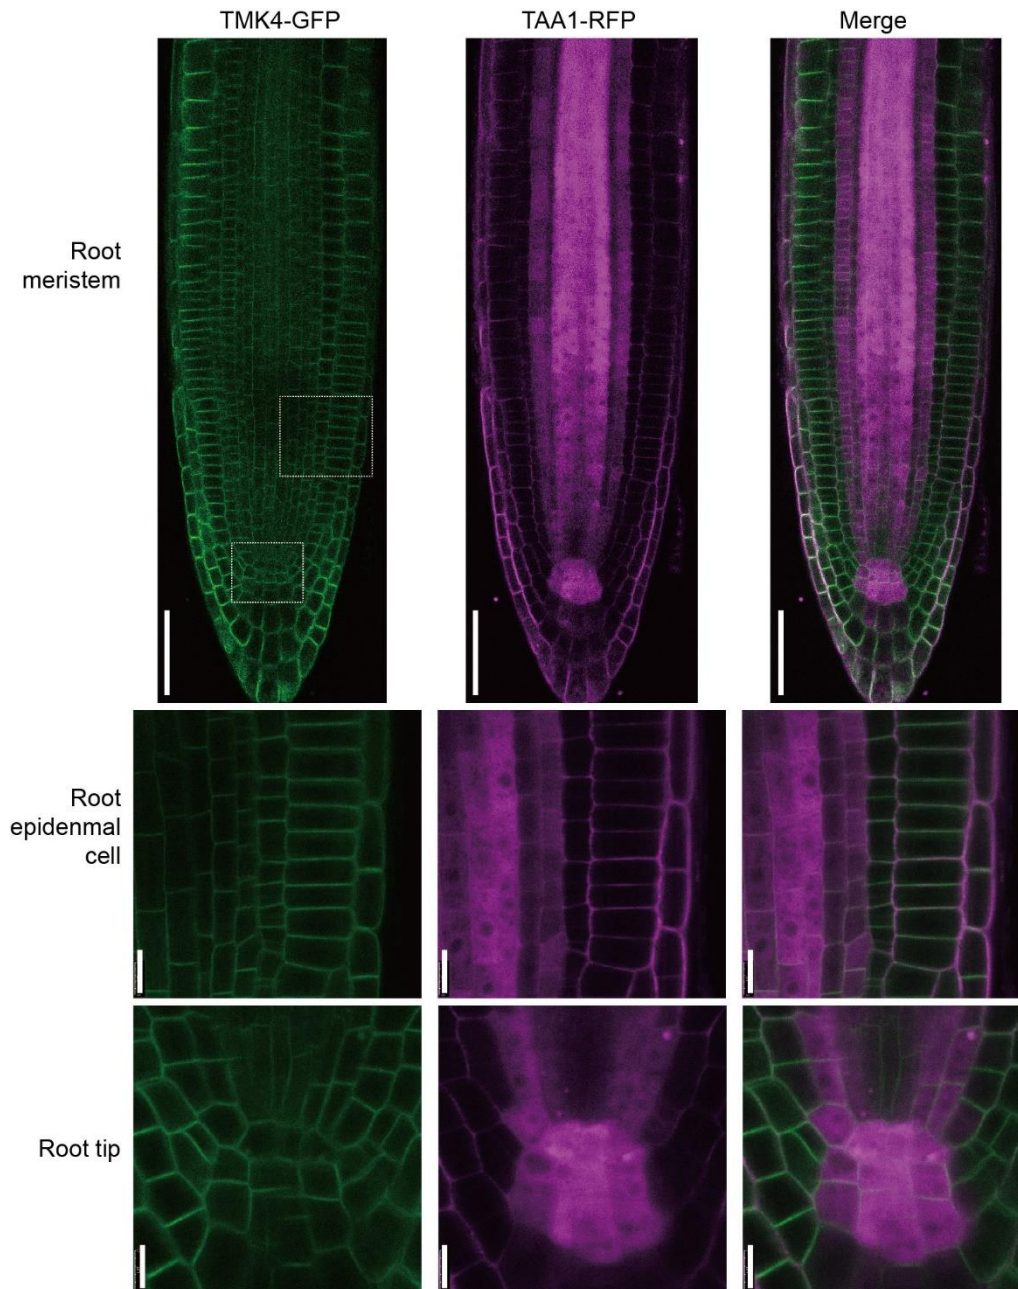

**Supplementary Figure 9. Subcellular co-localization of TMK4 and TAA1 in roots.**

The pictures were taken by TCS SP8 microscopy using 5-day-old transgenic plants (*pTMK4-TMK4-GFP* crossed with *pTAA1-TAA1-RFP*). About 7 individual seedlings were observed. The upper pictures showed whole root meristem zone, Scale bar, 50  $\mu\text{m}$ . Boxes indicates two regions magnified to show root epidermal cells and root tip respectively. Scale bar, 8  $\mu\text{m}$ .

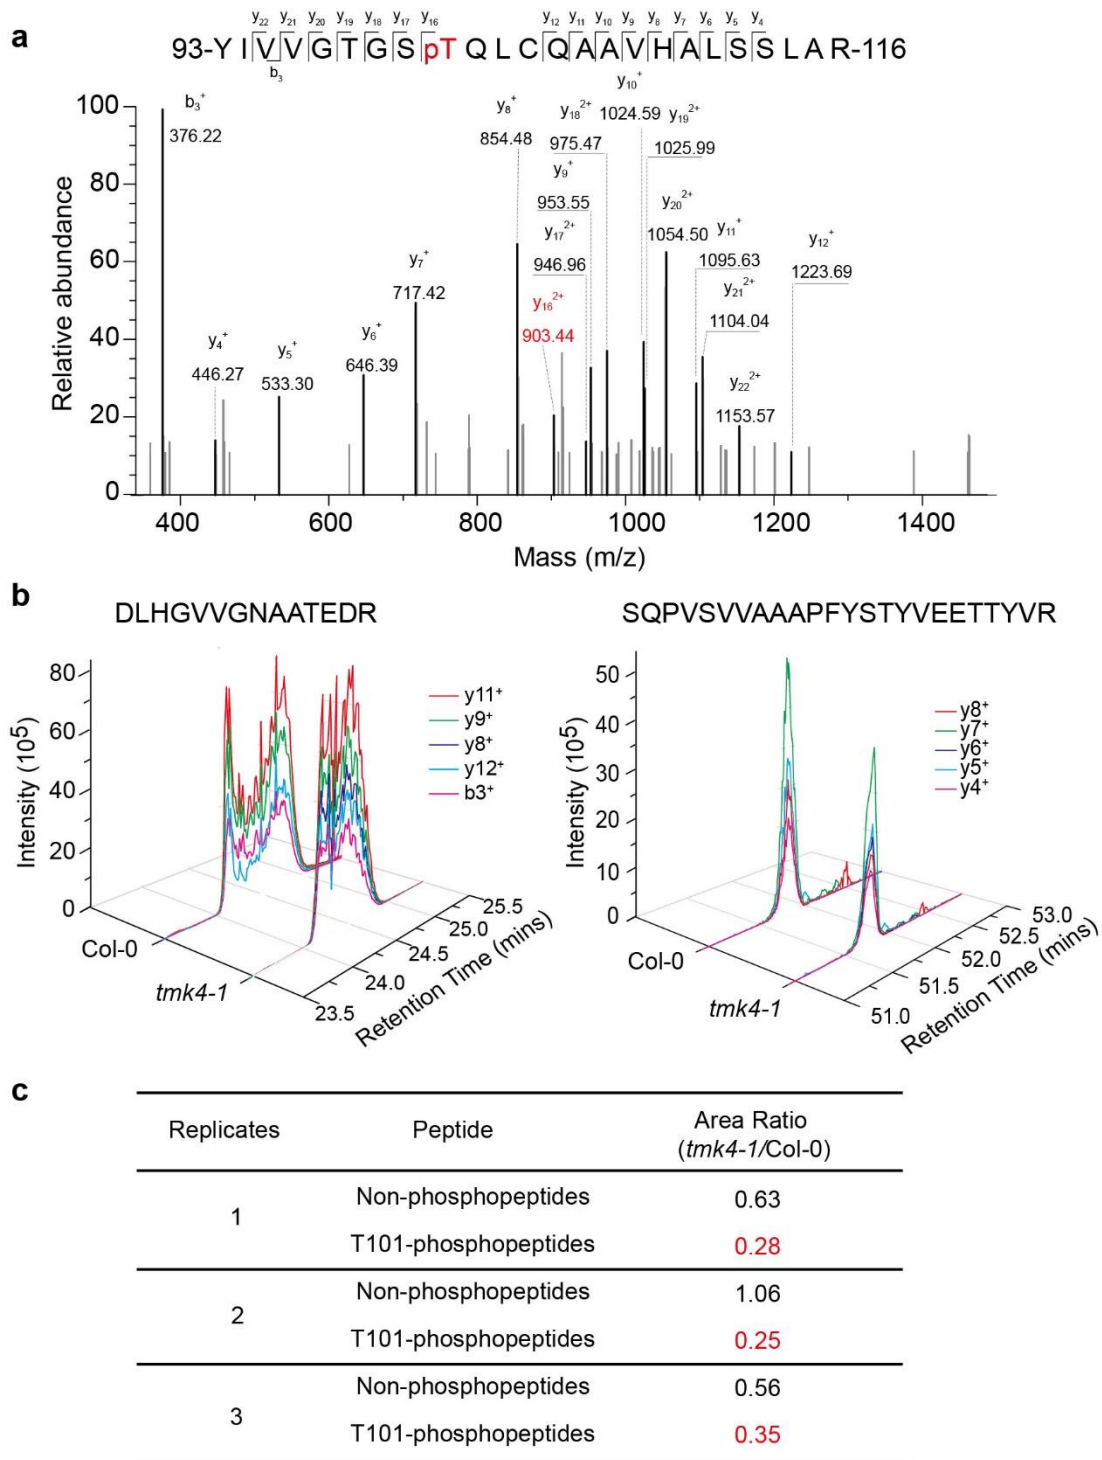

**Supplementary Figure 10. MS analyses showing TMK4 phosphorylates T101 site on TAA1 protein.**

(a) Phosphor-peptide containing T101 site was detected by mass spectrometric analysis. *E.coli*-purified TAA1 proteins were used to perform the *in vitro* kinase reaction together

with TMK4 kinase domain then sent for MS analysis to identify phosphorylation sites. The mass increased 80 Da (weight of phosphate group) starting at y<sub>16</sub> ion defined the phosphorylation modification at Thr101.

(b) Representative mass spectrometric analysis of two non-phosphorylation peptides indicated protein amount of TAA1-GFP in Col-0 and *tmk4-1*. This was shown as the internal reference of Fig.3e.

(c) Three independent biological repeats of mass spectrometric analysis showed T101 phosphorylation level of TAA1 decreased in *tmk4-1*.

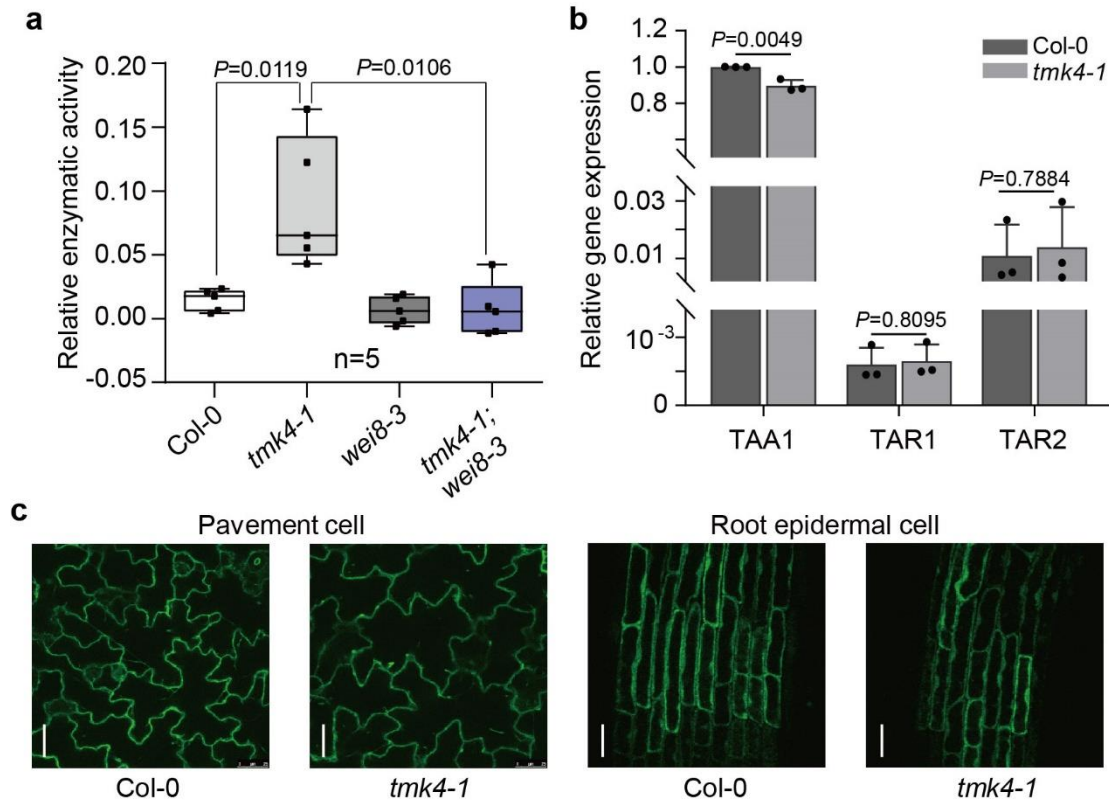

**Supplementary Figure 11. TMK4 negatively regulates TAA1 enzymatic activity but not the transcription and subcellular localization of TAA1 *in vivo*.**

(a) *In vivo* transaminase catalytic activity in Col-0, *tmk4-1*, *wei8-3* and *tmk4-1;wei8-3*. IPA concentration was determined with Salkowski reagent (see methods). Transaminase catalytic reactions were performed with reaction reagents containing protein extracts from Col-0, *tmk4-1*, *wei8-3* and *tmk4-1;wei8-3* roots ( $n$ =five biological repeats).  $P$ -values were shown as indicated, two-sided  $t$ -test.  $P<0.05$  indicates a significant difference. Centre line in box represents mean and whiskers show minimum to maximum.

(b) qRT-PCR assay showed *TAA1* families gene expression level in Col-0 and *tmk4-1*. Roots from 5-day-old seedlings were used for RNA extraction. Data represented mean with s.d. from three biological repeats.  $P$ -values were shown as indicated, two-sided  $t$ -test.

(c) Subcellular localization of TAA1-GFP in Col-0 and *tmk4-1*. Images were taken from pavement cells and root epidermal cells. Scale bar, 25  $\mu$ m.

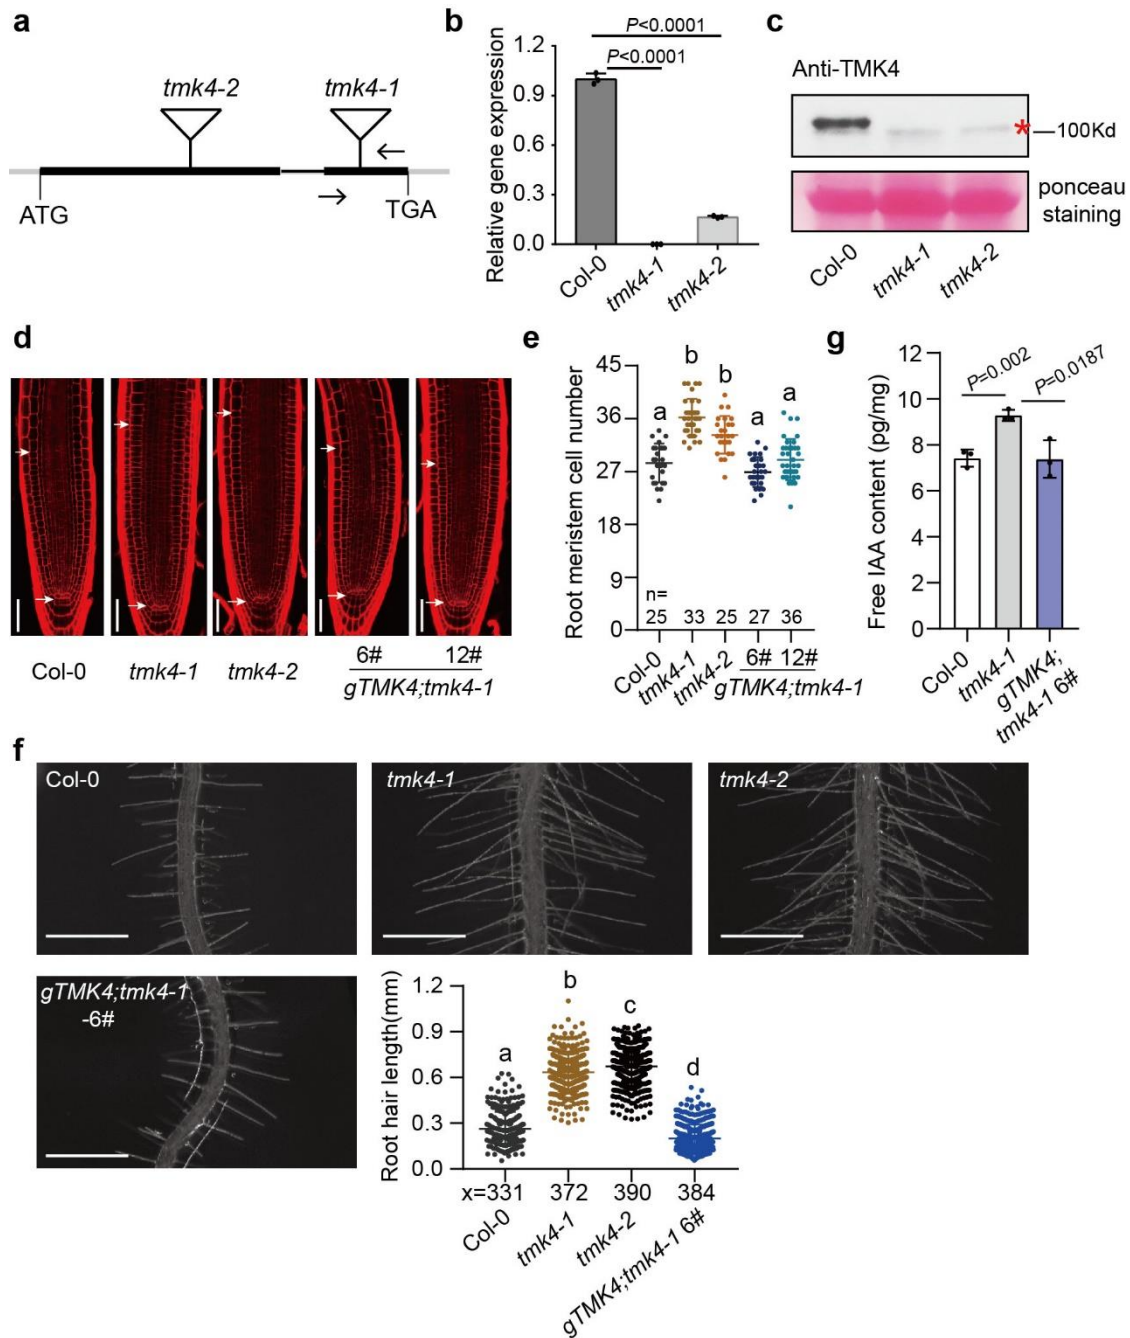

**Supplementary Figure 12. TMK4 negatively regulates auxin content and root development-related processes.**

(a) Description of T-DNA insertion mutants of *tmk4*. Lines represent introns; black and grey boxes represent exons and untranslated regions. Arrows show primers used for *TMK4* gene expression detection. Primer sequences were listed in Supplementary Table 2.

(b) qRT-PCR assay showed *TMK4* expression level in different *tmk4* mutants. Data represented mean with s.d., *P*-values were shown as indicated, two-sided *t*-test.

(c) Western blot results showed TMK4 protein level in *tmk4* mutants detected by TMK4 antibody. The red asterisk denotes a non-specific band.

(d) Representative images of root meristem from 5-day-old seedlings in *tmk4* mutants and *pTMK4-gTMK4-GFP;tmk4-1* complementation transgenic lines. White arrows show the meristem zone; scale bar, 50  $\mu$ m.

(e) Quantification of root meristem size in (d). n denotes number of independent seedlings. One-way ANOVA with Tukey multiple comparisons test was used. Different letters represent significant difference between each other,  $P < 0.0001$ .

(f) Representative pictures of root hair from 5-day-old *tmk4* mutants and complementation transgenic lines (n=31) and quantification data. n denotes number of individual seedlings and x represents number of root hairs used for quantification. Scale bar, 0.5 mm. 3 independent complementation transgenic lines showed similar results. One-way ANOVA with Tukey multiple comparisons test was used. Different letters represent significant difference between each other,  $P < 0.0001$ .

(g) Free IAA quantification of 8-day-old seedlings in *tmk4-1* and complementation transgenic line. Values indicated mean  $\pm$  s.d. from three individual biological repeats. *P*-values were shown as indicated, two-sided *t*-test.

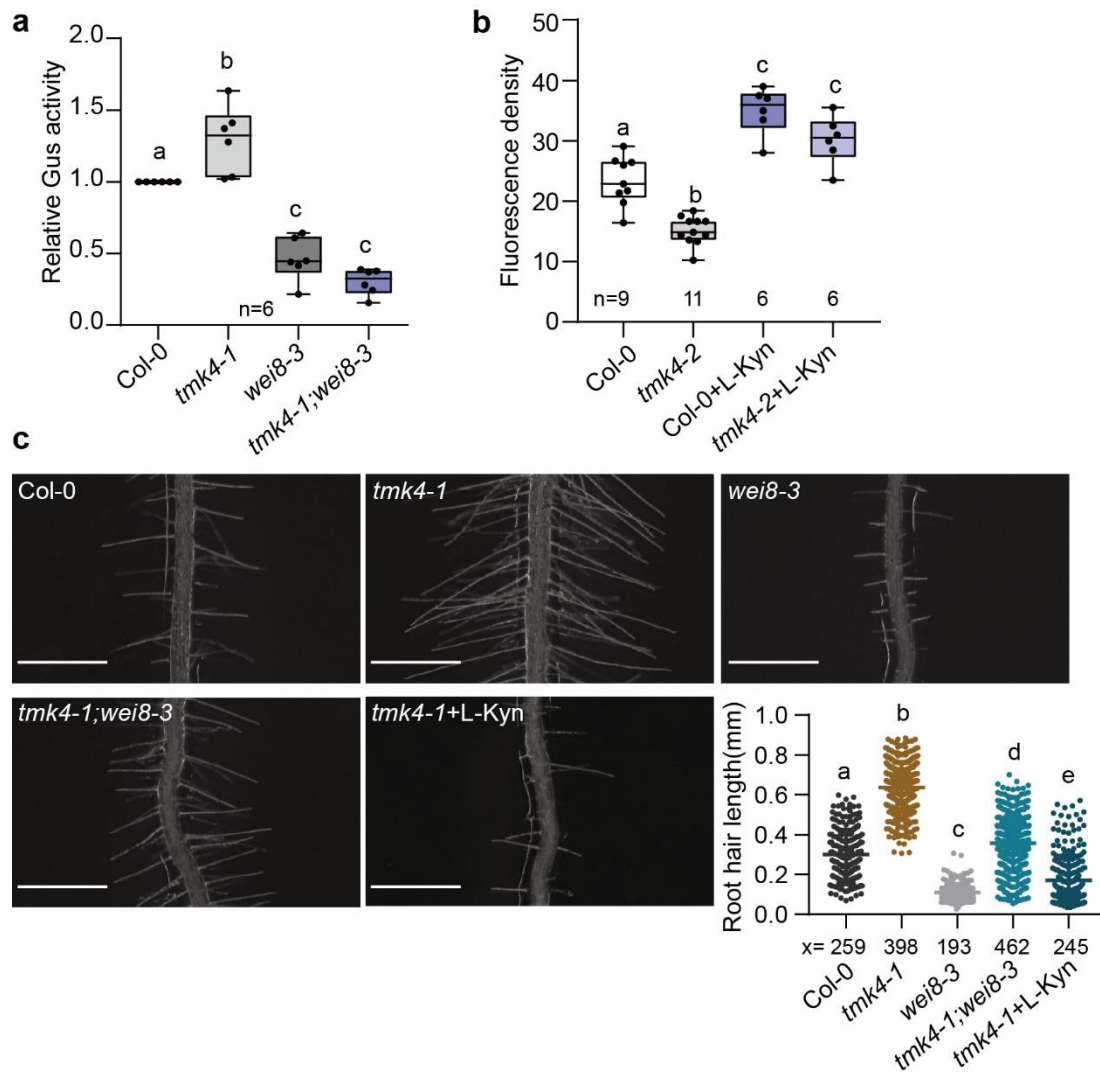

**Supplementary Figure 13. TAA1 contributes to overproduced auxin in *tmk4-1*.**

(a) Quantification data and statistical analysis of DR5-GUS activity in different mutants. Six independent biological repeats (n) were performed. Centre line in box represents mean and whiskers show minimum to maximum.

(b) Quantification of DII-Venus fluorescence signal in Fig. 4b. 1.5  $\mu$ M L-Kyn was used for treatment. n denotes number of independent seedlings. Centre line in box represents mean and whiskers show minimum to maximum.

(c) Representative pictures of root hair from 5-day-old seedlings and quantification data. Col-0: n=20; *tmk4-1*: n=30; *wei8-3*: n=20; *tmk4-1;wei8-3*: n=34; *tmk4-1* +L-Kyn: n=19. n denotes number of independent seedlings and x represents number of root hairs used for quantification. Scale bar, 0.5 mm. One-way ANOVA with Tukey multiple

comparisons test was used in (a-c). Different letters represent significant difference between each other.  $P<0.05$ (a),  $P<0.01$ (b),  $P<0.0001$ (c).

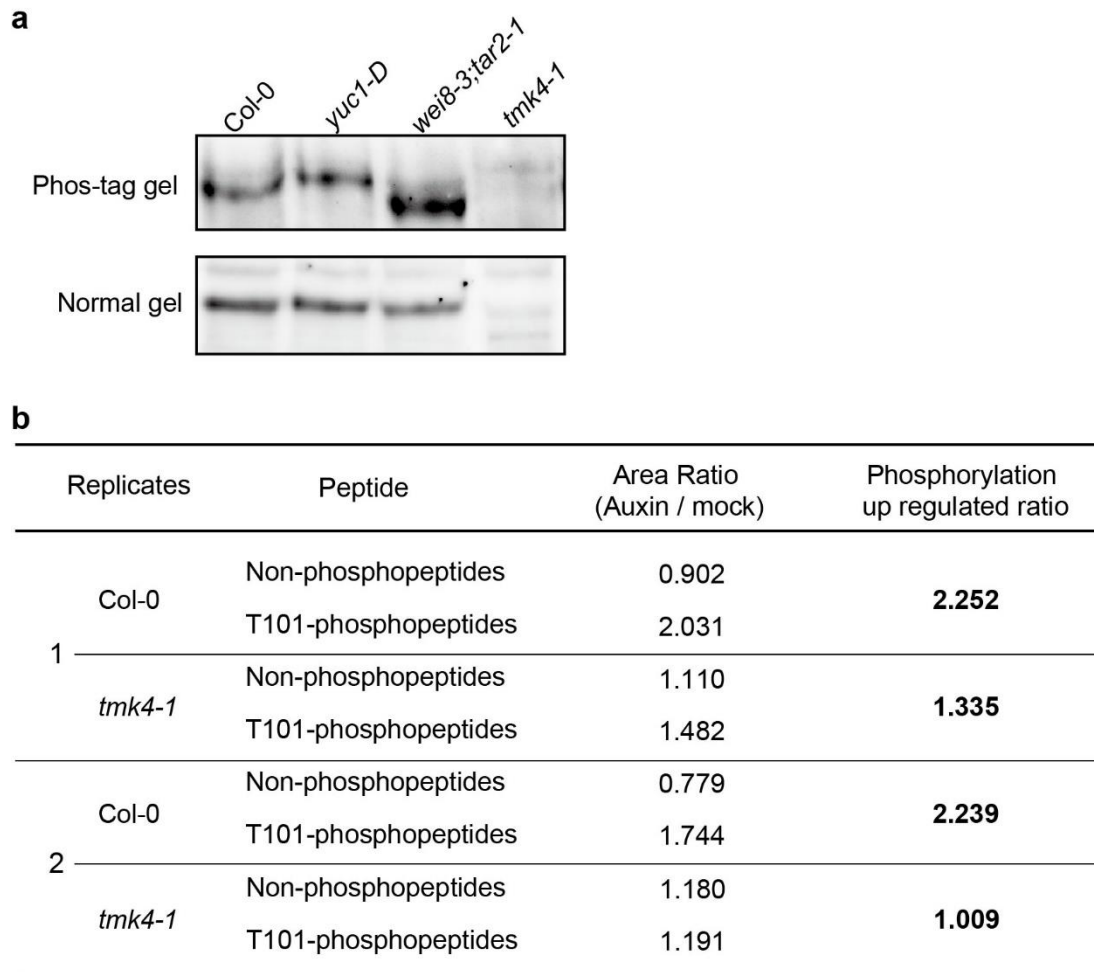

**Supplementary Figure 14. TMK4 is involved in self-regulation of auxin biosynthesis.**

(a) Gel shift assay showed TMK4 phosphorylation level increased in *yuc1-D* but decreased in *wei8-3;tar2-1*. 5-day-old seedlings were used for protein extraction. TMK4 proteins were detected by anti-TMK4 antibody. Two biological repeats with similar results.

(b) Auxin enhanced T101 phosphorylation of TAA1 partially through TMK4. TAA1-GFP proteins used for quantitative mass spectrometric analysis were immuno-precipitated from the protoplasts treated with EtOH (as mock) or 500 nM IAA (sigma I2886) for 10 mins. 35S-TAA1-GFP plasmids were transformed into Col-0 and *tmk4-1* protoplasts incubated for 8 hrs.

**Supplementary Table 1: Information on TAA proteins of different species.**

| No. | Name of proteins   | Gene ID in Phytosome database              | Organism                          | protein size (aa) |
|-----|--------------------|--------------------------------------------|-----------------------------------|-------------------|
| 1   | Marpo.0032s0124    | <i>Mapoly0032s0124</i>                     | <i>Marchantia polymorpha</i>      | 531               |
| 2   | Phypa.17_6500      | <i>Pp3c17_6500</i>                         | <i>Physcomitrella patens</i>      | 525               |
| 3   | Phypa.18_15140     | <i>Pp3c18_15140</i>                        | <i>Physcomitrella patens</i>      | 519               |
| 4   | Phypa.21_15370     | <i>Pp3c21_15370</i>                        | <i>Physcomitrella patens</i>      | 511               |
| 5   | Phypa.26_12520     | <i>Pp3c26_12520</i>                        | <i>Physcomitrella patens</i>      | 442               |
| 6   | Sphfa.0003s0188    | <i>Sphfalx0003s0188</i>                    | <i>Sphagnum fallax</i>            | 551               |
| 7   | Sphfa.0021s0188    | <i>Sphfalx0021s0188</i>                    | <i>Sphagnum fallax</i>            | 659               |
| 8   | Sphfa.0026s0096    | <i>Sphfalx0026s0096</i>                    | <i>Sphagnum fallax</i>            | 669               |
| 9   | Sphfa.0076s0008    | <i>Sphfalx0076s0008</i>                    | <i>Sphagnum fallax</i>            | 559               |
| 10  | Selmo.171289       | <i>171289</i>                              | <i>Selaginella moellendorffii</i> | 359               |
| 11  | Pinab.2120g0020    | <i>MA_2120g0020</i>                        | <i>Pinus abies</i>                | 352               |
| 12  | Pinta.000019549    | <i>PITA_000019549-RA</i>                   | <i>Pinus taeda</i>                | 565               |
| 13  | Pinta.000027613    | <i>PITA_000027613-RA</i>                   | <i>Pinus taeda</i>                | 538               |
| 14  | Pinta.000027966    | <i>PITA_000027966-RA</i>                   | <i>Pinus taeda</i>                | 541               |
| 15  | Anaco.027902       | <i>Aco027902</i>                           | <i>Ananas comosus</i>             | 433               |
| 16  | Ambtr.00011.7      | <i>evm_27.TU.AmTr_v1.0_scaffold00011.7</i> | <i>Amborella trichopoda</i>       | 460               |
| 17  | Musac.3G20730_001  | <i>GSMUA_Achr3G20730_001</i>               | <i>Musa acuminata</i>             | 468               |
| 18  | Musac.6G08900_001  | <i>GSMUA_Achr6G08900_001</i>               | <i>Musa acuminata</i>             | 387               |
| 19  | Musac.10G20770_001 | <i>GSMUA_Achr10G20770_001</i>              | <i>Musa acuminata</i>             | 448               |
| 20  | Spipo.19G0018400   | <i>Spipo19G0018400</i>                     | <i>Spirodela polyrhiza</i>        | 450               |
| 21  | Zosma.1g02950      | <i>Zosma1g02950</i>                        | <i>Zostera marina</i>             | 383               |
| 22  | Zosma.209g00410    | <i>Zosma209g00410</i>                      | <i>Zostera marina</i>             | 403               |
| 23  | Bradi.2g04290      | <i>Bradi2g04290</i>                        | <i>Arabidopsis lyrata</i>         | 498               |
| 24  | Bradi.2g34400      | <i>Bradi2g34400</i>                        | <i>Brachypodium distachyon</i>    | 431               |

|    |                    |                      |                             |     |
|----|--------------------|----------------------|-----------------------------|-----|
| 25 | Orysa.01g07500.1   | LOC_Os01g07500.1     | <i>Oryza sativa</i>         | 507 |
| 26 | Orysa.05g07720.1   | LOC_Os05g07720.1     | <i>Oryza sativa</i>         | 441 |
| 27 | Seita.3G100400     | Seita.3G100400       | <i>Setaria italica</i>      | 424 |
| 28 | Seita.3G100500     | Seita.3G100500       | <i>Setaria italica</i>      | 506 |
| 29 | Seita.5G119600     | Seita.5G119600       | <i>Setaria italica</i>      | 540 |
| 30 | Seita.6G075800     | Seita.6G075800       | <i>Setaria italica</i>      | 433 |
| 31 | Sobic.003G052700   | Sobic.003G052700     | <i>Sorghum bicolor</i>      | 538 |
| 32 | Sobic.009G060100   | Sobic.009G060100     | <i>Sorghum bicolor</i>      | 432 |
| 33 | Sobic.009G060300   | Sobic.009G060300     | <i>Sorghum bicolor</i>      | 515 |
| 34 | Maize.2G066345     | GRMZM2G066345        | <i>Zea mays</i>             | 536 |
| 35 | Maize.2G127160     | GRMZM2G127160        | <i>Zea mays</i>             | 431 |
| 36 | Maize.2G127308     | GRMZM2G127308        | <i>Zea mays</i>             | 530 |
| 37 | Maize.2G141810     | GRMZM2G141810        | <i>Zea mays</i>             | 435 |
| 38 | Aquco.3G274600     | Aqcoe3G274600        | <i>Aquilegia coerulea</i>   | 391 |
| 39 | Aquco.3G276300     | Aqcoe3G276300        | <i>Aquilegia coerulea</i>   | 351 |
| 40 | Aquco.3G276800     | Aqcoe3G276800        | <i>Aquilegia coerulea</i>   | 467 |
| 41 | Solyc.03g112460    | Solyc03g112460.2     | <i>Solanum lycopersicum</i> | 444 |
| 42 | Solyc.05g031600    | Solyc05g031600.1     | <i>Solanum lycopersicum</i> | 391 |
| 43 | Solyc.06g071640    | Solyc06g071640.2     | <i>Solanum lycopersicum</i> | 437 |
| 44 | Soltu.400007680    | PGSC0003DMG400007680 | <i>Solanum tuberosum</i>    | 355 |
| 45 | Soltu.400007681    | PGSC0003DMG400007681 | <i>Solanum tuberosum</i>    | 393 |
| 46 | Soltu.400018110    | PGSC0003DMG400018110 | <i>Solanum tuberosum</i>    | 443 |
| 47 | Soltu.400025405    | PGSC0003DMG400025405 | <i>Solanum tuberosum</i>    | 385 |
| 48 | Soltu.400027079    | PGSC0003DMG400027079 | <i>Solanum tuberosum</i>    | 439 |
| 49 | Vitvi.G01004095001 | GSVIVG01004095001    | <i>Vitis vinifera</i>       | 410 |
| 50 | Vitvi.G01006656001 | GSVIVG01006656001    | <i>Vitis vinifera</i>       | 419 |
| 51 | Vitvi.G01007679001 | GSVIVG01007679001    | <i>Vitis vinifera</i>       | 473 |

|    |                  |                                 |                             |     |
|----|------------------|---------------------------------|-----------------------------|-----|
| 52 | Potri.008G187800 | <i>Potri.008G187800</i>         | <i>Populus trichocarpa</i>  | 377 |
| 53 | Potri.010G044500 | <i>Potri.010G044500</i>         | <i>Populus trichocarpa</i>  | 365 |
| 54 | Potri.012G083300 | <i>Potri.012G083300</i>         | <i>Populus trichocarpa</i>  | 457 |
| 55 | Potri.015G081900 | <i>Potri.015G081900</i>         | <i>Populus trichocarpa</i>  | 457 |
| 56 | Citsi.1g012785   | <i>orange1.1g012785m.g</i>      | <i>Citrus sinensis</i>      | 456 |
| 57 | Citsi.1g018172   | <i>orange1.1g018172m.g</i>      | <i>Citrus sinensis</i>      | 360 |
| 58 | Citcl.10020085   | <i>Ciclev10020085m.g</i>        | <i>Citrus clementina</i>    | 458 |
| 59 | Citcl.10033774   | <i>Ciclev10033774m.g</i>        | <i>Citrus clementina</i>    | 434 |
| 60 | Carpa.35.70      | <i>evm.TU.supercontig_35.70</i> | <i>Carica papaya</i>        | 448 |
| 61 | Carpa.69.95      | <i>evm.TU.supercontig_69.95</i> | <i>Carica papaya</i>        | 364 |
| 62 | Thecc.1EG010471  | <i>Thecc1EG010471</i>           | <i>Theobroma cacao</i>      | 399 |
| 63 | Thecc.1EG012202  | <i>Thecc1EG012202</i>           | <i>Theobroma cacao</i>      | 452 |
| 64 | Gosra.005G180100 | <i>Gorai.005G180100</i>         | <i>Gossypium raimondii</i>  | 401 |
| 65 | Gosra.006G189500 | <i>Gorai.006G189500</i>         | <i>Gossypium raimondii</i>  | 438 |
| 66 | Arath.TAA1       | <i>Arabidopsis TAA1</i>         | <i>Arabidopsis thaliana</i> | 391 |
| 67 | Arath.TAR1       | <i>Arabidopsis TAR1</i>         | <i>Arabidopsis thaliana</i> | 388 |
| 68 | Arath.TAR2       | <i>Arabidopsis TAR2</i>         | <i>Arabidopsis thaliana</i> | 440 |
| 69 | Araly.1G37110    | <i>AL1G37110</i>                | <i>Arabidopsis lyrata</i>   | 387 |
| 70 | Araly.2G29950    | <i>AL2G29950</i>                | <i>Arabidopsis lyrata</i>   | 392 |
| 71 | Araly.7G28530    | <i>AL7G28530</i>                | <i>Arabidopsis lyrata</i>   | 440 |
| 72 | Brara.A01473     | <i>Brara.A01473</i>             | <i>Brassica rapa</i>        | 454 |
| 73 | Brara.B01919     | <i>Brara.B01919</i>             | <i>Brassica rapa</i>        | 381 |
| 74 | Brara.G02980     | <i>Brara.G02980</i>             | <i>Brassica rapa</i>        | 381 |
| 75 | Brara.I03242     | <i>Brara.I03242</i>             | <i>Brassica rapa</i>        | 381 |
| 76 | Brara.I03244     | <i>Brara.I03244</i>             | <i>Brassica rapa</i>        | 382 |
| 77 | Prupe.1G248200   | <i>Prupe.1G248200</i>           | <i>Prunus persica</i>       | 408 |
| 78 | Prupe.1G248300   | <i>Prupe.1G248300</i>           | <i>Prunus persica</i>       | 354 |
| 79 | Prupe.5G168300   | <i>Prupe.5G168300</i>           | <i>Prunus persica</i>       | 437 |
| 80 | Maldo.0000203835 | <i>MDP0000203835</i>            | <i>Malus domestica</i>      | 431 |
| 81 | Maldo.0000267098 | <i>MDP0000267098</i>            | <i>Malus domestica</i>      | 448 |

|    |                  |                                |                            |     |
|----|------------------|--------------------------------|----------------------------|-----|
| 82 | Maldo.0000310220 | <i>MDP0000310220</i>           | <i>Malus domestica</i>     | 404 |
| 83 | Maldo.0000616079 | <i>MDP0000616079</i>           | <i>Malus domestica</i>     | 407 |
| 84 | Medtr.3g077250   | <i>Medtr3g077250</i>           | <i>Medicago truncatula</i> | 441 |
| 85 | Medtr.4g105220   | <i>Medtr4g105220</i>           | <i>Medicago truncatula</i> | 437 |
| 86 | Medtr.5g033510   | <i>Medtr5g033510</i>           | <i>Medicago truncatula</i> | 401 |
| 87 | Medtr.5g033520   | <i>Medtr5g033520</i>           | <i>Medicago truncatula</i> | 394 |
| 88 | Frave.03586      | <i>gene03586.1-v1.0-hybrid</i> | <i>Fragaria vesca</i>      | 434 |
| 89 | Frave.31790      | <i>gene31790.1-v1.0-hybrid</i> | <i>Fragaria vesca</i>      | 432 |
| 90 | Frave.31791      | <i>gene31791.1-v1.0-hybrid</i> | <i>Fragaria vesca</i>      | 530 |
| 91 | Glyma.01G027400  | <i>Glyma.01G027400</i>         | <i>Glycine max</i>         | 391 |
| 92 | Glyma.02G037600  | <i>Glyma.02G037600</i>         | <i>Glycine max</i>         | 392 |
| 93 | Glyma.04G186700  | <i>Glyma.04G186700</i>         | <i>Glycine max</i>         | 445 |
| 94 | Glyma.05G040400  | <i>Glyma.05G040400</i>         | <i>Glycine max</i>         | 452 |
| 95 | Glyma.06G179000  | <i>Glyma.06G179000</i>         | <i>Glycine max</i>         | 439 |
| 96 | Glyma.17G086500  | <i>Glyma.17G086500</i>         | <i>Glycine max</i>         | 453 |

**Supplementary Table 2: Primers list.**

| Primers name   | Primers sequence (5'-3')                              | Notes                     |
|----------------|-------------------------------------------------------|---------------------------|
| gTMK4 GW-F     | GGGGACAAGTTTGTACAAAAAAGCAGGCTTATGTGGTTTATGTCATTTATT   | PDONR-zeo construction    |
| gTMK4 GW-R     | GGGGACCACTTTGTACAAGAAAGCTGGGTAAACCATCAGCTGAATCGAAAGTA |                           |
| gTAA1 GW-F     | GGGGACAAGTTTGTACAAAAAAGCAGGCTTACTCCATATCGAGGGTATGAA   |                           |
| gTAA1 GW-R     | GGGGACCACTTTGTACAAGAAAGCTGGGTAAAGGTCAATGCTTTTAA       |                           |
| TAA1 GW-F      | GGGGACAAGTTTGTACAAAAAAGCAGGCTTAATGGTGAAACTGGAGAACTC   |                           |
| TAA1 GW-R      | GGGGACCACTTTGTACAAGAAAGCTGGGTAAAGGTCAATGCTTTTAA       |                           |
| MpTAA GW-F     | GGGGACAAGTTTGTACAAAAAAGCAGGCTTAATGTCGTCTCGAATGGACTCA  |                           |
| MpTAA GW-R     | GGGGACCACTTTGTACAAGAAAGCTGGGTACGACATGTCGACTGCAGACTG   |                           |
| tmk4-1 LP      | TGCGATTGCTCAAAGAGGTCAGA                               | Genotyping primers        |
| tmk4-1 RP      | GGCTGCATTGGTTGCACTGGAT                                |                           |
| tmk4-2 LP      | AAATGTCTATGCCTGACC                                    |                           |
| tmk4-2 RP      | TCCAAGAGCGAGAATCTC                                    |                           |
| wei8-3 LP      | CATGATGTCATGGTCTTGACG                                 |                           |
| wei8-3 RP      | TTTACTCCGTAAGTCCCCACC                                 |                           |
| tar2-1 LP      | CACAATCTCTTTGGCAAGCTC                                 |                           |
| tar2-1 RP      | TAGTGGAATTTTGTATTGCTTG                                |                           |
| tar1-1 LP      | GATTCGTTATGACATTGGCG                                  |                           |
| tar1-1 RP      | CGATTGAAGATACGATGCCTC                                 |                           |
| P35S           | GACGCACAATCCCACTATCC                                  |                           |
| PTAA-R         | CTACGACATGTCGACTGC                                    |                           |
| TMK4 qRT-F     | AGGCACTCGACCAAACCTTA                                  | qRT-PCR primers           |
| TMK4 qRT-R     | ACGACGGTTTCCACTTCTCT                                  |                           |
| TAA1 qRT-F     | GATGAAGAATCGGTGGGAGA                                  |                           |
| TAA1 qRT-R     | TGACTCGGACATGCTTCTTG                                  |                           |
| TAR1 qRT-F     | TCCATTGGTGTGTCGAAGGA                                  |                           |
| TAR1 qRT-R     | AAACGCAGGAGAAGTGGAGA                                  |                           |
| TAR2 qRT-F     | GCTCTTCACTGCTTCAAAGAGCAC                              |                           |
| TAR2 qRT-R     | TCTGTCTTTCACCAAAGCCCATCC                              |                           |
| UBQ10 qRT-F    | GATCTTTGCCGAAAACA                                     | pBKT7-vector construction |
| UBQ10 qRT-R    | CGAAGATGAGACGCTGCT                                    |                           |
| PINOID NdeI F  | GGCATTCCATATGATGTTACGAGAATCAGAC                       |                           |
| PINOID EcoRI R | CCGGAATTCAAAGTAATCGAACGCCGCTGG                        |                           |
| D6PK NdeI F    | GGCATTCCATATGATGATGGCTTCAAAAACCTCC                    |                           |
| D6PK PstI R    | CCGCTGCAGGGAAGAAATCAAACCTCAAGA                        |                           |
| FLS2 C NdeI F  | GGCATTCCATATGAATTCATCAGAGTCCTCATT                     |                           |

|                 |                                       |                                                  |
|-----------------|---------------------------------------|--------------------------------------------------|
| FLS2 C BamHI R  | AGGTCGACGGATCCCAACTTCTCGATCCTCGTTACG  |                                                  |
| BAK1 C NdeI F   | GGCAITCCATATGTTCTTTGATGTACCAGCTGA     |                                                  |
| BAK1 C BamHI R  | CGCGGATCCTTATCTTGACCCGAGGGGT          |                                                  |
| BIN2 NdeI F     | GGCAITCCATATGATGGCTGATGATAAGGAGAT     |                                                  |
| BIN2 EcoRI R    | CCGGAATTCAGTTCCAGATTGATTCAAGAA        |                                                  |
| BRI1 C NdeI F   | GGCAITCCATATGTCCATAATGATAGTCTGAT      |                                                  |
| BRI1 C EcoRI R  | CCGGAATTCATAATTTTCCTTCAGGAA           |                                                  |
| TAA1 XmaI R     | TCGACCCGGGCTAAAGGTCAATGCTTTT          | pGEX4T-2                                         |
| TAA1 BamHI F    | CGCGGATCCATGGTGAAACTGGAGAATC          | vector construction                              |
| TAA1 StuI R     | AAAAGGCCTAAGGTCAATGCTTTTAATGA         | HBT vector construction                          |
| TMK4 KD EcoRI F | ATCCGAATTCTTCAGTGAGGATAACATA          | His-sumo vector/<br>PGEX4T-2 vector construction |
| TMK4 KD NotI R  | ATTATGCGGCCGCTCACCGACCATCAGCTG        |                                                  |
| TMK4 KD BmaHI   | CCGCGTGGATCCGGGGGTTTCGGTGTCGTG        | PET14                                            |
| TMK4 BclI F     | GCGCCTGATCAATGGAGGCTCCTACGCCTC        | vector and HBT vector construction               |
| TMK4 StuI R     | AAAAGGCCTCCGACCATCAGCTGAATCGA         | Site-directed mutagenesis                        |
| TAA1 T101A F    | AGTGGTTGGGACCGGTTTCGGCGCAGCTTTGTCAAGC |                                                  |
| TAA1 T101A R    | GCTTGACAAAGCTGCGCCGAACCGGTCCCAACCACT  |                                                  |
| TAA1 T101D F    | GTTTGGGACCGGTTTCGGACCAGCTTTGTCAAGCCG  |                                                  |
| TAA1 T101D R    | CGGCTTGACAAAGCTGGTCCGAACCGGTCCCAACC   |                                                  |
| MpTAA T224D F   | TCCGACCAACTCTCCAGGCTGCATTG            |                                                  |
| MpTAA T224D R   | CAATGCAGCCTGGAAGAGTTGGTCGGA           |                                                  |
